# Supplementary material for: Antibiotic Toxicity Isolated and as Binary Mixture to Freshwater Algae Raphidocelis subcapitata: Growth Inhibition, Prediction Model, and Environmental Risk Assessment
Source: MDPI journal article supplement (doi:10.3390/toxics10120739), 2022-11-29
Supplement: s1 [file s1]

# Antibiotic Toxicity isolated and as Binary mixture to Freshwater Algae *Raphidocelis subcapitata*: Growth Inhibition, Prediction Model, and Environmental Risk Assessment

Fang Chang <sup>1</sup>, Malan Yi <sup>1</sup>, Huiting Li <sup>1</sup>, Jiangnan Wang <sup>1</sup>, Xuefeng Zhao <sup>2</sup>, Xiaoyue Hu <sup>2</sup>, Qianju Qi <sup>1,3,\*</sup>

## Text S1. The method of solid phase extraction and LC-MS/MS

The culture medium was filtered with 0.45  $\mu\text{m}$  micron nylon membrane, and diluted to 50 ml. The 30 ng of internal surrogate standard was added into sample. Then the sample solution was extracted solid phase extraction (SPE), with flow rate of 4–8 ml/min, rinsed the beakers by 10 ml ultra-pure water after samples were all passed through the cartridges, and then evacuated for one hour. The analyte was eluted with acetonitrile and dried in a 37°C water bath under a nitrogen stream. The samples of different concentration were reconstituted with different amounts of methanol. Then added different volumes of Atrazine-d5 internal standards (IS) to these groups, and made the concentration of Atrazine-d5 in each sample is 20 ng/ml. The sample solution was then transferred to an autosampler vial (with insert) for LC/MS/MS analysis.

Supplementary Table S1. Instrumental analysis of LC-MS/MS

| Column           | Agilent ZORBAX Eclipse Plus C18 HPLC column (3 $\times$ 100 mm, 1.8 $\mu\text{m}$ ) |       |
|------------------|-------------------------------------------------------------------------------------|-------|
| Mobile phase     | A: ultrapure water with 0.1% formic acid (v/v)                                      |       |
|                  | B: acetonitrile                                                                     |       |
| Column tem.      | 24 °C                                                                               |       |
| Injection volume | 10 $\mu\text{L}$                                                                    |       |
| Flow rate        | 0.3 mL/min                                                                          |       |
| Gradient         | A (%)                                                                               | B (%) |
| 0.00 min         | 92.5                                                                                | 7.5   |
| 1.00 min         | 92.5                                                                                | 7.5   |
| 3.00 min         | 88.0                                                                                | 12.0  |
| 4.50 min         | 80.0                                                                                | 20.0  |
| 6.00 min         | 40.0                                                                                | 60.0  |
| 9.00 min         | 10.0                                                                                | 90.0  |
| 10.00 min        | 10.0                                                                                | 90.0  |
| 11.00 min        | 92.5                                                                                | 7.5   |

**Supplementary Table S2.** Optimized retention time, ion transitions, ion transitions, collision cell exit potential for MS/MS determination of target antibiotic.

| Compound            | Retention time (min) | Ion transitions (m/z) | Collision energy (eV) | Collision cell exit potential (V) |
|---------------------|----------------------|-----------------------|-----------------------|-----------------------------------|
| Sulfamethoxazole    | 7.06                 | 254 > 155.9           | 80                    | 15                                |
|                     |                      | 254 > 108             |                       | 25                                |
| Sulfamethazine      | 4.2                  | 275.1 > 186.1         | 120                   | 12                                |
|                     |                      | 275.1 > 156.1         |                       | 14                                |
| Sulfamethazine-d4   | 7.01                 | 283.1 > 124.2         | 124                   | 30                                |
|                     |                      | 283.1 > 186.1         |                       | 20                                |
|                     |                      | 221.0 > 101.0         |                       | 30                                |
| Atrazine-D5         | 8.72                 | 221.0 > 137.0         | 113                   | 25                                |
|                     |                      | 221.0 > 179.0         |                       | 20                                |
| Erythromycin        | 7.65                 | 734.5 > 158.2         | 140                   | 30                                |
|                     |                      | 734.5 > 576.4         |                       | 20                                |
| Erythromycin-13C-d3 | 7.31                 | 738.6 > 162.0         | 146                   | 34                                |
|                     |                      | 738.6 > 582.5         |                       | 19                                |

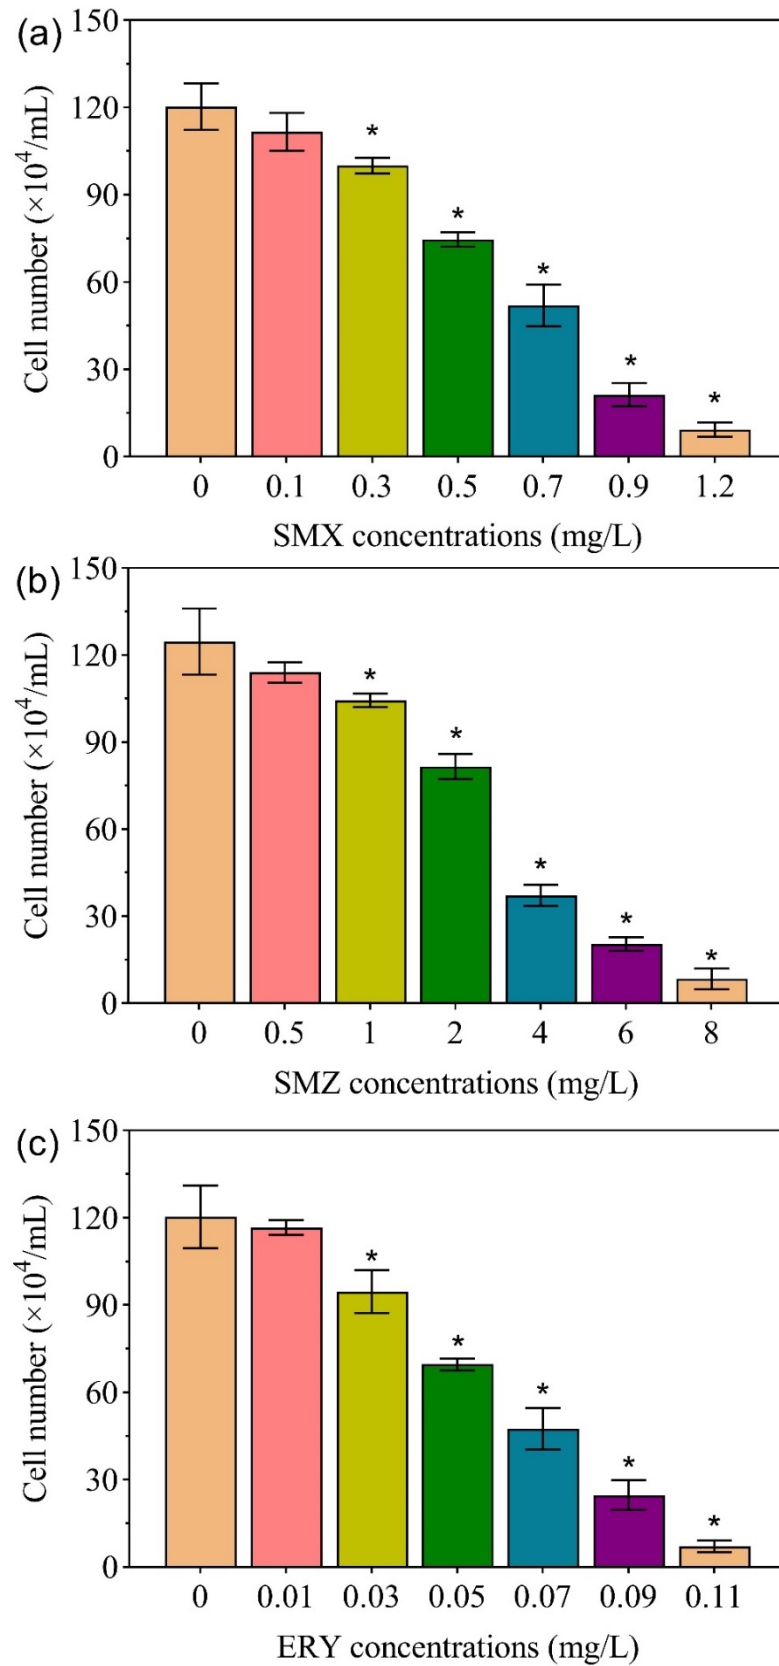

**Figure S1.** Effect of (a) SMX, (b) SMZ and (c) ERY on the biomass of *R. subcapitata*. \* represents a statistically significant difference ( $p < 0.05$ ).

**Supplementary Table S3.** Parameters of *R. subcapitata* at 96 h were fitted using log (inhibitor) and response-variable slope (four parameters) models.

| Parameter<br>s                    | Best-fit values |               |               |         |         | 95 % confidence intervals |                      |                      |                  |                    |    |
|-----------------------------------|-----------------|---------------|---------------|---------|---------|---------------------------|----------------------|----------------------|------------------|--------------------|----|
|                                   | SMX             | SMZ           | ERY           | SMX+ERY | SMX+SMZ | SMX                       | SMZ                  | ERY                  | SMX+SMZ          | SMX+ERY            |    |
| <b>Top</b>                        | 114.4<br>mg/L   | 96.37<br>mg/L | 117.5<br>mg/L | 114.2   | 96.74   | 108.6<br>120.4            | to87.09<br>114.7     | to111.3<br>124.0     | to77.95<br>N/A   | to91.47<br>103.3   | to |
| <b>LogEC<sub>50</sub></b>         | -0.2132         | 0.5098        | -1.250        | -0.4299 | 0.3316  | -2.248 to<br>2.881        | -0.4771 to<br>0.5560 | to-1.291<br>1.213    | to-0.5161<br>N/A | to0.3025<br>0.3661 | to |
| <b>EC<sub>50</sub></b>            | 0.6120<br>mg/L  | 3.235<br>mg/L | 0.056<br>mg/L | 0.3716  | 2.146   | 0.5646<br>0.6586          | to3.000<br>3.597     | to0.05119<br>0.06126 | to0.3047<br>N/A  | to2.007<br>2.323   | to |
| <b>Span</b>                       | 114.4           | 90.62         | 117.5         | 114.2   | 96.74   | /                         | /                    | /                    | /                | /                  |    |
| <b>Hill Slope</b>                 | -3.320          | 5.704         | -2.785        | 5.736   | 4.271   | -4.157 to<br>2.672        | -3.683 to<br>8.509   | to-3.452 to<br>2.265 | to -1.331<br>N/A | to3.264<br>5.720   | to |
| <b>Degrees<br/>of<br/>Freedom</b> | 18              | 2             | 18            | 3       | 4       | /                         | /                    | /                    | /                | /                  |    |
| <b>R squared</b>                  | 0.9757          | 0.9992        | 0.9756        | 0.9833  | 0.9967  | /                         | /                    | /                    | /                | /                  |    |
| <b>Sum of<br/>Squares</b>         | 853.0           | 5.823         | 877.9         | 136.4   | 28.94   | /                         | /                    | /                    | /                | /                  |    |
| <b>Sy.x</b>                       | 6.884           | 1.706         | 6.984         | 6.743   | 2.690   | /                         | /                    | /                    | /                | /                  |    |

**Supplementary Table S4.** Effective concentration (EC<sub>50</sub>) and risk quotients of SMX, SMZ, ERY and their mixture for *R. subcapitata*.

|                                     |               | SMX   | SMZ   | ERY   | SMX+SMZ | SMX+ERY | CA<br>(SMX+SMZ) | IA<br>(SMX+SMZ) | CA<br>(SMX+ERY) | IA<br>(SMX+ERY) |
|-------------------------------------|---------------|-------|-------|-------|---------|---------|-----------------|-----------------|-----------------|-----------------|
| RQ of individual                    | Surface water | 6.650 | 3.308 | 6.226 | /       | /       | /               | /               | /               | /               |
|                                     | Wastewater    | 19.44 | 69.47 | 14.41 | /       | /       | /               | /               | /               | /               |
| RQ <sub>MEC/PNEC</sub> <sup>a</sup> | Surface water | /     | /     | /     | 7.022   | 11.89   | 8.085           | 4.633           | 10.84           | 10.35           |
|                                     | Wastewater    | /     | /     | /     | 34.59   | 1.07    | 130.32          | 74.67           | 31.17           | 29.79           |
| RQ <sub>STU</sub> <sup>b</sup>      | Surface water | /     | /     | /     | 9.959   | 88.92   | /               | /               | /               | /               |
|                                     | Wastewater    | /     | /     | /     | 12.88   | 33.85   | /               | /               | /               | /               |
| RQ <sub>QSAR</sub> <sup>c</sup>     | Surface water | /     | /     | /     | 2.460   | 40.22   | /               | /               | /               | /               |
|                                     | Wastewater    | /     | /     | /     | 0.6736  | 1.945   | /               | /               | /               | /               |

<sup>a</sup> The maximum concentration of SMX used to calculate the RQ of surface water and wastewater was 4.07 and 11.9 µg/L, respectively. The maximum concentration of SMZ used to calculate the RQ of surface water and wastewater was 11 and 231 µg/L, respectively. The maximum concentration of ERY used to calculate the RQ of surface water and wastewater in Table 1 was 0.35 and 0.81 µg/L, respectively.

<sup>b</sup> The EC<sub>50</sub> values of SMX, SMZ and ERY to *Daphnia* were 127.45, 194.8 and 45.1 mg/L, respectively. The EC<sub>50</sub> values of SMX, SMZ and ERY to *Daphnia* were more than 1000 mg/L, which was defined as N/A.

<sup>c</sup> Based on the QSAR, the EC<sub>50</sub> values of SMX, SMZ and ERY to algae were 21.8, 19.5 and 6.37 mg/L, respectively. the EC<sub>50</sub> values of SMX, SMZ and ERY to *Daphnia* were 6.43, 6.02 and 8.62 mg/L, respectively. the EC<sub>50</sub> values of SMX, SMZ and ERY to fish were 267, 195 and 6.84 mg/L, respectively.
